# Supplementary material
Source: ML conference proceedings conference paper supplement (https://openreview.net/forum?id=85BzB3WP-qj)
Supplement: supplementary_material [file attachment]

---

# Across-animal odor decoding by probabilistic manifold alignment — Supplementary information—

---

**Pedro Herrero-Vidal**  
Center for Neural Science  
Neuroscience Institute  
New York University  
pmh314@nyu.edu

**Dmitry Rinberg**  
Neuroscience Institute  
Center for Neural Science  
NYU Langone Health  
rinberg@nyu.edu

**Cristina Savin**  
Center for Neural Science  
Center for Data Science  
New York University  
cs5360@nyu.edu

## S1 amLDS inference: Kalman smoothing

The goal is to estimate the posterior distribution of the latent state  $\mathbf{z}_t$  using all available measurements  $\mathbf{x}_{1:T}$ . This posterior has joint multivariate Gaussian statistics with marginal parameters  $\mu_{t|T}$  and  $\Sigma_{t|T}$ , which is computed in two stages, a forward pass corresponding to Kalman filtering and a backward pass which implements Kalman smoothing. We will use the double index  $t|t'$  to denote both the time index of the latent variable,  $t$ , and to signal the range of observations that the posterior is conditioned on  $t'$ , namely,  $P(\mathbf{z}_t | \mathbf{x}_{1:t'}, \theta) = \mathcal{N}(\mu_{t|t'}, \Sigma_{t|t'})$ .

The Kalman filtering involves recursive updates in a forward pass, alternating between updates that propagate beliefs about the current state  $\mathbf{z}_t$  given only the previous state  $\mathbf{z}_{t-1}$ , using the stimulus-specific parameters:

$$\mu_{t|t-1} = \mathbf{A}_k \mu_{t|t-1} + \mathbf{b}_{k,t} \quad (1)$$

$$\Sigma_{t|t-1} = \mathbf{A}_k \Sigma_{t|t-1} \mathbf{A}_k^\top + \mathbf{Q}_k, \quad (2)$$

and steps that incorporate evidence from the current observation  $\mathbf{x}_t$ , via the animal-specific observation model parameters:

$$\mu_{t|t} = \mu_{t|t-1} + \mathbf{K}_t (\mathbf{x}_t - \mathbf{C}_m \mu_{t|t-1}) \quad (3)$$

$$\Sigma_{t|t} = \Sigma_{t|t-1} + \mathbf{K}_t \mathbf{C}_m \Sigma_{t|t-1} \quad (4)$$

$$\mathbf{K}_t = \Sigma_{t|t-1} \mathbf{C}_m^\top (\mathbf{C}_m \Sigma_{t|t-1} \mathbf{C}_m^\top + \mathbf{R}_m)^{-1}, \quad (5)$$

where  $\mathbf{K}_t$  denotes the Kalman gain.

The smoothing (backward pass) incorporates evidence from the later part of the observation sequence:

$$\mu_{t|T} = \mu_{t|t} + \mathbf{F}_t (\mu_{t+1|T} - \mu_{t+1|t}) \quad (6)$$

$$\Sigma_{t|T} = \Sigma_{t|t} + \mathbf{F}_t (\Sigma_{t+1|T} - \Sigma_{t+1|t}) \mathbf{F}_t^\top \quad (7)$$

$$\mathbf{F}_t = \Sigma_{t|t} \mathbf{A}_k^\top \Sigma_{t+1|t}^{-1}, \quad (8)$$

with  $\mathbf{F}_t$  denoting the smoothing analogue of the Kalman gain.

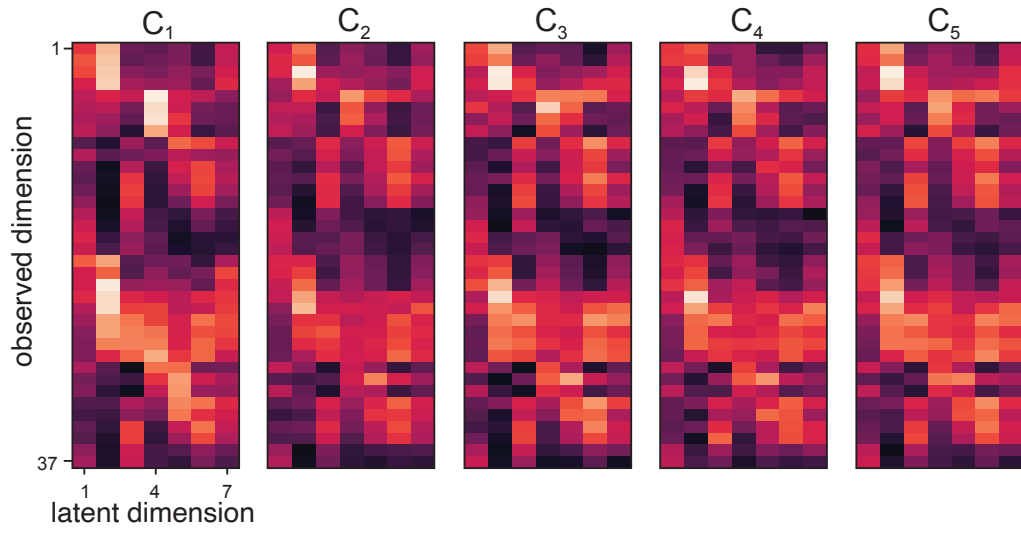

Figure S1: **Manifold alignment across animals.** Animal-specific loading matrices  $C_m$  estimated using amLDS from the olfactory bulb neural datasets. The observation space (y-axis) includes the set of electrodes that are active (not damaged) in all animals.

## Checklist

1. For all authors...
  - (a) Do the main claims made in the abstract and introduction accurately reflect the paper's contributions and scope? [\[Yes\]](#) Yes, it's accurate.
  - (b) Did you describe the limitations of your work? [\[Yes\]](#) See Section 2 and Discussion.
  - (c) Did you discuss any potential negative societal impacts of your work? [\[N/A\]](#) We don't foresee any obvious negative societal impact from this work.
  - (d) Have you read the ethics review guidelines and ensured that your paper conforms to them? [\[Yes\]](#) Yes, it conforms.
2. If you are including theoretical results...
  - (a) Did you state the full set of assumptions of all theoretical results? [\[Yes\]](#) See Section 2.
  - (b) Did you include complete proofs of all theoretical results? [\[Yes\]](#) See Section 2 and Supplementary 1.
3. If you ran experiments...
  - (a) Did you include the code, data, and instructions needed to reproduce the main experimental results (either in the supplemental material or as a URL)? [\[Yes\]](#) A full description of the model and simulations is provided on Sections 2-4. Supplementary code is provided to replicate the results. A complete description of the neural data is provided on Section 4.
  - (b) Did you specify all the training details (e.g., data splits, hyperparameters, how they were chosen)? [\[Yes\]](#) See Sections 2-4
  - (c) Did you report error bars (e.g., with respect to the random seed after running experiments multiple times)? [\[Yes\]](#) See figure captions and Sections 3 and 4
  - (d) Did you include the total amount of compute and the type of resources used (e.g., type of GPUs, internal cluster, or cloud provider)? [\[Yes\]](#) See Section 3. amLDS memory and computational demands are really low, both parameter learning and inference can run on a laptop computer.
4. If you are using existing assets (e.g., code, data, models) or curating/releasing new assets...
  - (a) If your work uses existing assets, did you cite the creators? [\[Yes\]](#) We use code from scikit-learn, which we credit in reference [27].
  - (b) Did you mention the license of the assets? [\[N/A\]](#)
  - (c) Did you include any new assets either in the supplemental material or as a URL? [\[Yes\]](#) The model and a user tutorial is provided as supplementary material.
  - (d) Did you discuss whether and how consent was obtained from people whose data you're using/curating? [\[N/A\]](#)
  - (e) Did you discuss whether the data you are using/curating contains personally identifiable information or offensive content? [\[N/A\]](#)
5. If you used crowdsourcing or conducted research with human subjects...
  - (a) Did you include the full text of instructions given to participants and screenshots, if applicable? [\[N/A\]](#)
  - (b) Did you describe any potential participant risks, with links to Institutional Review Board (IRB) approvals, if applicable? [\[N/A\]](#)
  - (c) Did you include the estimated hourly wage paid to participants and the total amount spent on participant compensation? [\[N/A\]](#)
